# Supplementary material for: Precise control of photoemission and circularly polarized emission achieved through resonant coupling of chiral nanoparticles with Ag particles
Source: Royal Society of Chemistry journal article supplement (doi:10.1039/d4qi02598a), 2024-12-25
Supplement: d4qi02598a1.pdf [file d4qi02598a1.pdf]

# **Precise control of photoemission and circularly polarized emission achieved through resonant coupling of chiral nanoparticles with Ag particles**

Rongze Ma,<sup>a</sup> Dedan Mu,<sup>a</sup> Yanni Lang,<sup>a</sup> Liang Xu,<sup>a</sup> Haoxin Wang,<sup>b</sup> Songtao Li,<sup>b</sup> Yongjin Li,<sup>a</sup> Zhiguo Song,<sup>a</sup> Dacheng Zhou,<sup>a</sup> Yong Yang,<sup>a</sup> Yugeng Wen,<sup>a</sup> Jin Han,<sup>\* a</sup> and Jianbei Qiu<sup>\* a</sup>

<sup>a</sup>Faculty of Materials Science and Engineering

Key Laboratory of Advanced Materials of Yunnan Province

Kunming University of Science and Technology

Kunming 650093, P. R. China

Prof. Jin Han, Email: [jaakaa@163.com](mailto:jaakaa@163.com)

Prof. Jianbei Qiu, Email: [qiu@kust.edu.cn](mailto:qiu@kust.edu.cn)

<sup>b</sup>Department of Mathematics and Physics, North China Electric Power University, 071003 Baoding, China

Prof. Songtao Li, Email: [songtaoli2001@126.com](mailto:songtaoli2001@126.com)

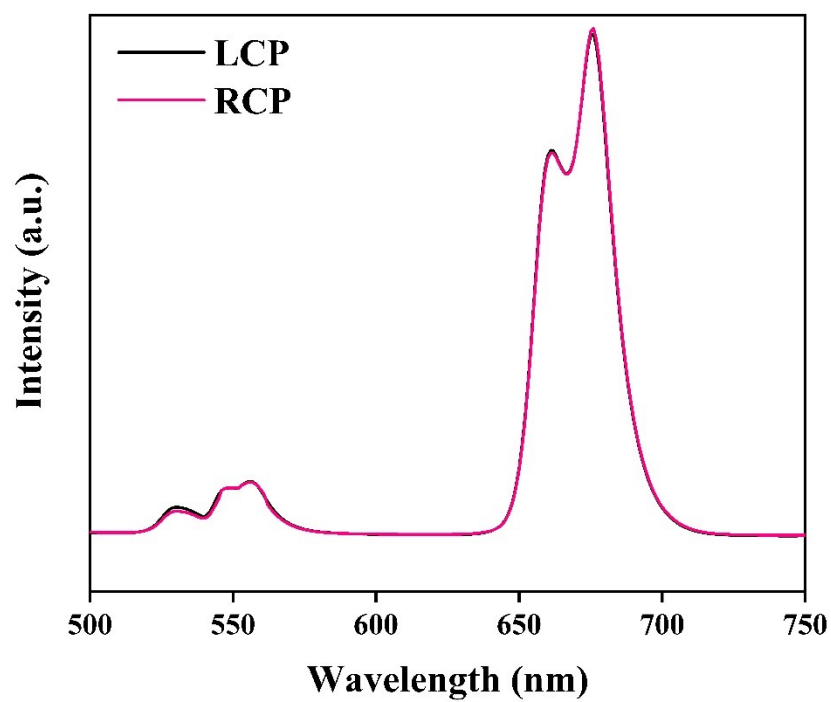

Figure S1. LCP and RCP UCL from the A-BYE.

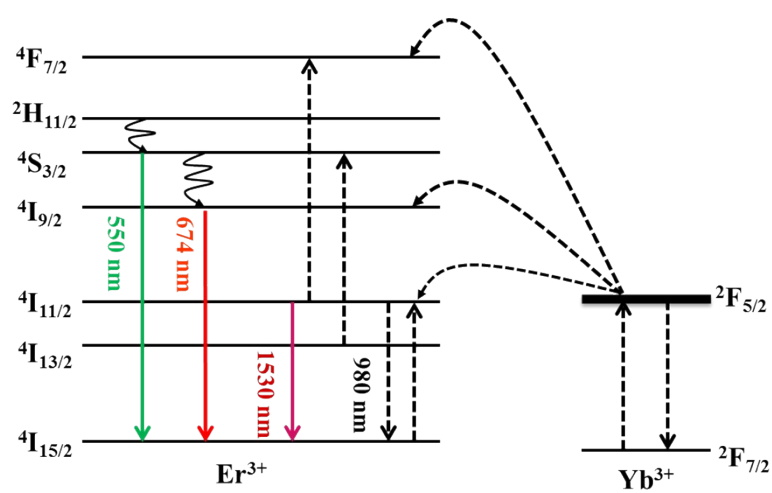

Figure S2. Schematic illustration of the energy transfer mechanism.

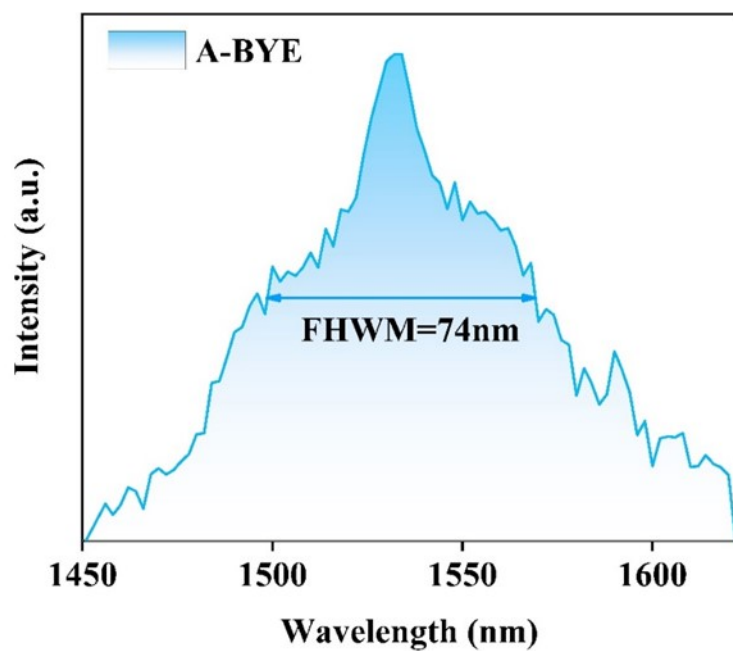

Figure S3. PL emission spectra of A-BYE samples under 980 nm laser excitation, with full width at half maximum (FWHM) labeled.

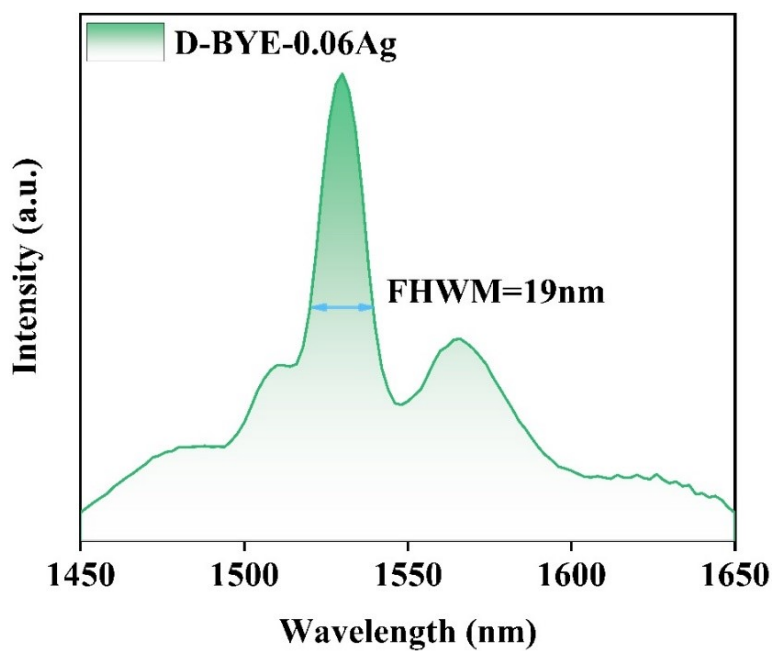

Figure S4. PL emission spectra of D-BYE-0.06Ag samples under 980 nm laser excitation, with FWHM labeled.

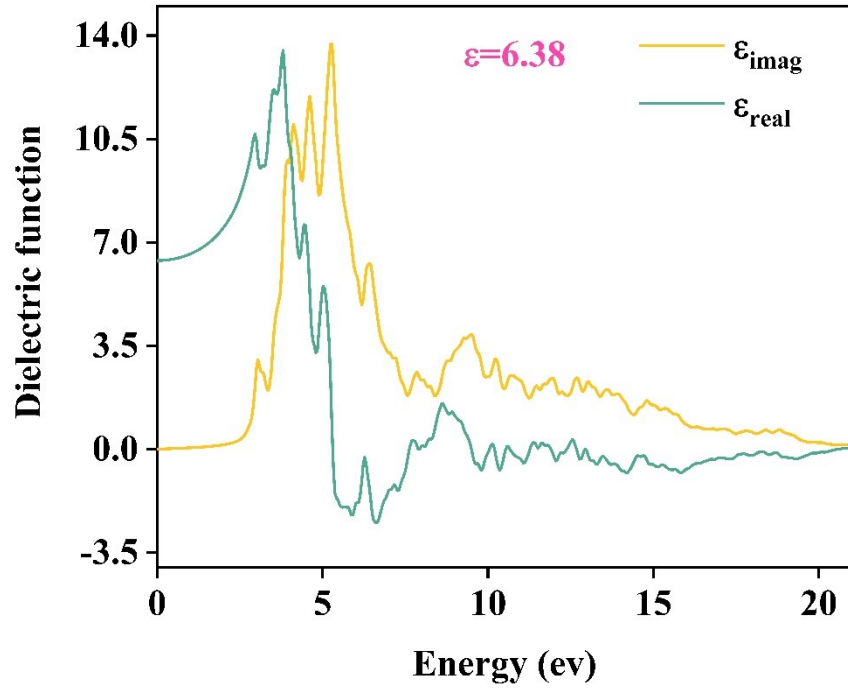

Figure S5. Dielectric function diagram of D-BYE calculated by first principles.

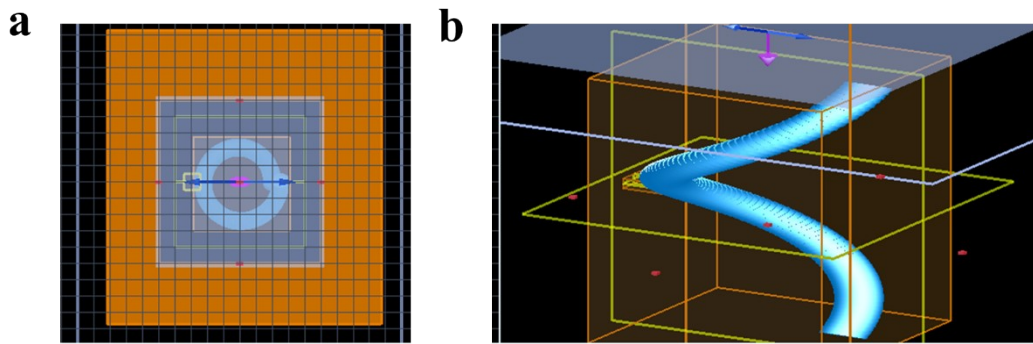

Figure S6. FDTD solution modeling for D-BYE samples.

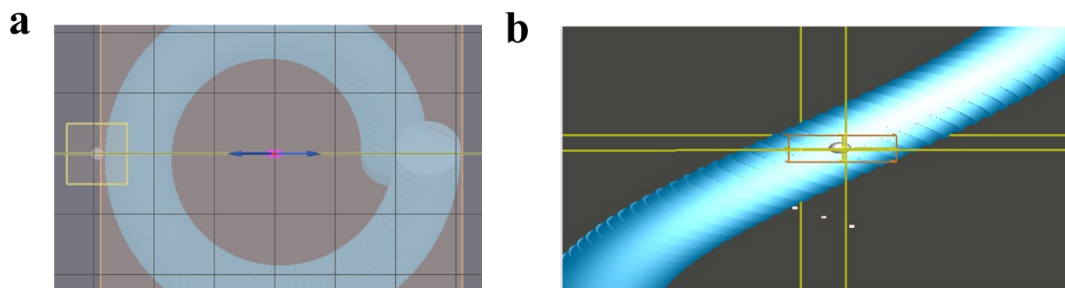

Figure S7. FDTD solution modeling for D-BYE-0.06Ag samples.

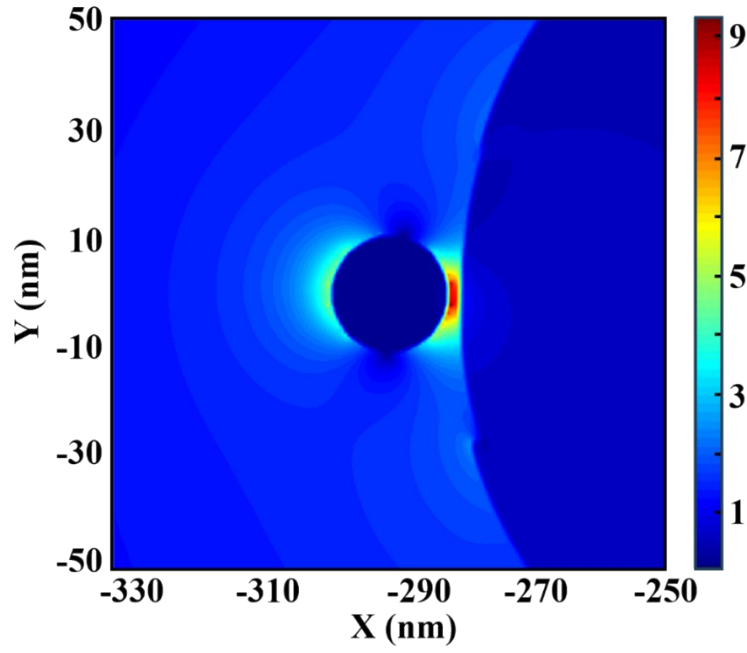

Figure S8. Electromagnetic field distribution in the X-Y plane obtained from an FDTD simulation of the D-BYE-0.06Ag.

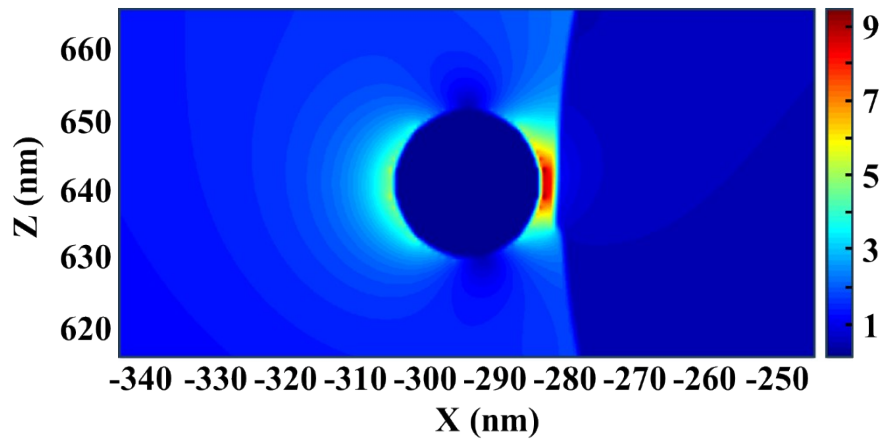

Figure S9. Electromagnetic field distribution in the X-Z plane obtained from an FDTD simulation of the D-BYE-0.06Ag.
